# Supplementary material for: Acyl substrate preferences of an IAA-amido synthetase account for variations in grape (Vitis vinifera L.) berry ripening caused by different auxinic compounds indicating the importance of auxin conjugation in plant development
Source: PubMed Central journal article supplement — J Exp Bot. 2011 May 4;62(12):4267–80. doi: 10.1093/jxb/err134 (PMC3153680; doi:10.1093/jxb/err134), 2011-05-04
Supplement: supp_err134_00061507-file001.pdf [file supp_err134_00061507-file001.pdf]

**Acyl substrate preferences of an IAA-amido synthetase account for variations in grape (*Vitis vinifera* L.) berry ripening caused by different auxinic compounds indicating the importance of auxin conjugation in plant development**

Christine Böttcher, Paul K. Boss and Christopher Davies

**Table S1.** NCBI, GenBank or Swiss-Prot accession numbers of the protein sequences used for the phylogenetic analysis

| Species                     | Protein name | Accession no. |
|-----------------------------|--------------|---------------|
| <i>Arabidopsis thaliana</i> | At GH3-1     | AAC61292      |
|                             | At GH3-2     | CAB38206      |
|                             | At GH3-3     | AAB7114       |
|                             | At GH3-4     | AAF79776      |
|                             | At GH3-5     | CAA19720      |
|                             | At GH3-6     | BAA97524      |
|                             | At GH3-7     | AAC00604      |
|                             | At GH3-8     | BAB08663      |
|                             | At GH3-9     | AAC63630      |
|                             | At GH3-10    | AAD14468      |
|                             | At GH3-11    | AAD23040      |
|                             | At GH3-12    | CAB86639      |
|                             | At GH3-13    | CAB86642      |
|                             | At GH3-14    | CAB87143      |
|                             | At GH3-15    | CAB87144      |
|                             | At GH3-16    | CAB87145      |
|                             | At GH3-17    | AAF98442      |
|                             | At GH3-18    | AAG60120      |
|                             | At GH3-19    | AAG60122      |
| <i>Capsicum chinense</i>    | Cc GH3       | AAS02074      |
| <i>Glycine max</i>          | Gm GH3       | CAA42636      |
| <i>Medicago truncatula</i>  | Mt ABN09059  | ABN09059      |
| <i>Nicotiana tabacum</i>    | Nt GH3       | AAD32141      |
| <i>Oryza sativa</i>         | Os GH3-1     | BAB92590      |
|                             | Os GH3-2     | BAF06259      |
|                             | Os GH3-3     | EEE54131      |
|                             | Os GH3-4     | AAU90225      |
|                             | Os GH3-5     | BAG92652      |

|                              |             |              |
|------------------------------|-------------|--------------|
|                              | Os GH3-6    | Q60EY1       |
|                              | Os GH3-7    | Q654M1       |
|                              | Os GH3-8    | BAC79627     |
|                              | Os GH3-9    | Q6ZLA3       |
|                              | Os GH3-10   | Q6ZLA7       |
|                              | Os GH3-11   | EEC82663     |
|                              | Os GH3-12   | Q53P49       |
|                              | Os GH3-13   | EAY81150     |
| <i>Physcomitrella patens</i> | Pp CAD42870 | CAD42870     |
|                              | Pp CAD42871 | CAD42871     |
| <i>Pinus pinaster</i>        | Pi CAJ14972 | CAJ14972     |
| <i>Populus trichocarpa</i>   | Pt GH3-1    | EEE70316     |
|                              | Pt GH3-2    | EEE87842     |
|                              | Pt GH3-3    | EEE85053     |
|                              | Pt GH3-4    | EEE95321     |
|                              | Pt GH3-5    | EEE97566     |
|                              | Pt GH3-6    | EEE95183     |
|                              | Pt GH3-7    | EEE84166     |
|                              | Pt GH3-8    | EEE78719     |
|                              | Pt GH3-9    | EEE81977     |
|                              | Pt GH3-10   | EEE95291     |
|                              | Pt GH3-11   | EEF07589     |
|                              | Pt GH3-12   | EEE80672     |
|                              | Pt GH3-13   | EEE98498     |
|                              | Pt GH3-14   | EEE99364     |
| <i>Vitis vinifera</i>        | Vv GH3-1    | XP_002271252 |
|                              | Vv GH3-2    | XP_002283886 |
|                              | Vv GH3-3    | XP_002283229 |
|                              | Vv GH3-4    | XP_002263353 |
|                              | Vv GH3-5    | XP_002276241 |
|                              | Vv GH3-6    | XP_002268278 |
|                              | Vv GH3-7    | XP_002272560 |
|                              | Vv GH3-8    | XP_002271002 |
|                              | Vv GH3-9    | CAN69491     |
| <i>Zea mays</i>              | Zm ACG44225 | ACG44225     |
|                              | Zm ACI46148 | ACI46148     |
|                              | Zm ACI46149 | ACI46149     |
|                              | Zm ACL54563 | ACL54563     |
|                              | Zm ACN32133 | ACN32133     |

---
